# Supplementary material for: South African Consumers’ Knowledge, Opinions and Awareness of Whole Grains and Their Health Benefits: A Cross-Sectional Online Survey
Source: MDPI journal article supplement (doi:10.3390/nu15163522), 2023-08-10
Supplement: s1 [file s1]

## SCREENING

We are looking for certain groups of people, so first let's confirm if you qualify to take part in the survey

Q1. Do you currently live in South Africa?

SINGLE MENTION

|     |   |          |
|-----|---|----------|
| Yes | 1 | CONTINUE |
| No  | 2 | CLOSE    |

Q2. Where in South Africa do you currently live?

SINGLE MENTION

|               |   |
|---------------|---|
| Eastern Cape  | 1 |
| Free State    | 2 |
| Gauteng       | 3 |
| KwaZulu-Natal | 4 |
| Limpopo       | 5 |
| Mpumalanga    | 6 |
| North West    | 7 |
| Northern Cape | 8 |
| Western Cape  | 9 |

Q3. Do you, or any of your close family or friends, work for any of these types of companies or professions?

READ LIST. MULTIPLE MENTIONS. RANDOMISE ORDER

|                                                                                                     |   |          |
|-----------------------------------------------------------------------------------------------------|---|----------|
| Advertising Agency                                                                                  | 1 | CLOSE    |
| Marketing/ Sales/ Promotions Company                                                                | 2 |          |
| Market Research Company                                                                             | 3 |          |
| Public relations                                                                                    | 4 |          |
| TV/ Radio/ Press/ Journalism                                                                        | 5 |          |
| Professions requiring a formal qualification in Food Science and Technology, Nutrition or Dietetics | 6 |          |
| Company that makes/ distributes/ sells breakfast cereals/ porridges                                 | 7 |          |
| None of the above                                                                                   | 8 | CONTINUE |

Q4. How old are you?

SINGLE MENTION

|                     |   |          |
|---------------------|---|----------|
| 17 years or younger | 1 | CLOSE    |
| 18-24 years         | 2 | CONTINUE |
| 25-34 years         | 3 |          |
| 35-44 years         | 4 |          |
| 45-54 years         | 5 |          |
| 55-64 years         | 6 |          |
| 65 years or above   | 7 | CLOSE    |

Q5. Are you...?

SINGLE MENTION

|                                 |   |             |
|---------------------------------|---|-------------|
| Female                          | 1 | CHECK QUOTA |
| Male                            | 2 |             |
| Nonbinary/ Prefer not to answer | 3 |             |

Q6. How would you describe your population group?

SINGLE MENTION

|                        |   |             |
|------------------------|---|-------------|
| Black                  | 1 | CHECK QUOTA |
| Mixed Race / Coloured  | 2 |             |
| Indian                 | 3 |             |
| White                  | 4 |             |
| Other (please specify) | 5 |             |

### SHORT LSM6

These next few questions will allow us to better understand your lifestyle and are therefore only for classification purposes.

QLSM1: Do you own a personal computer such as a laptop or desktop?

SINGLE MENTION

|     |   |           |
|-----|---|-----------|
| Yes | 1 | CONTINUE  |
| No  | 2 | ASK QLSM4 |

QLSM2: Do you own a motor vehicle?

SINGLE MENTION

|     |   |           |
|-----|---|-----------|
| Yes | 1 | CONTINUE  |
| No  | 2 | ASK QLSM5 |

QLSM3: Do you have hot running water from a geyser in your home?

SINGLE MENTION

|     |   |                   |
|-----|---|-------------------|
| Yes | 1 | CLASSIFY LSM 8-10 |
| No  | 2 | CLASSIFY LSM 5-7  |

QLSM4: Do you own a TV?

SINGLE MENTION

|     |   |           |
|-----|---|-----------|
| Yes | 1 | CONTINUE  |
| No  | 2 | ASK QLSM6 |

QLSM5: Do you own a floor polisher or vacuum cleaner?

SINGLE MENTION

|     |   |                   |
|-----|---|-------------------|
| Yes | 1 | CLASSIFY LSM 8-10 |
| No  | 2 | CLASSIFY LSM 5-7  |

QLSM6: Do you have an electric stove or gas stove with an oven??

SINGLE MENTION

|     |   |                  |
|-----|---|------------------|
| Yes | 1 | CLASSIFY LSM 5-7 |
| No  | 2 | CLASSIFY LSM 1-4 |

Q7. RECORD LSM

|          |   |             |
|----------|---|-------------|
| LSM 1-4  | 1 | CLOSE       |
| LSM 5-7  | 2 | CHECK QUOTA |
| LSM 8-10 | 3 |             |

## WHOLE GRAINS

- Q8. Which of these phrases best describes how well you understand the term "whole grains"?
- SINGLE MENTION

|                                                               |   |
|---------------------------------------------------------------|---|
| Among my circle of friends, I am the expert on whole grains   | 1 |
| I know what whole grains mean                                 | 2 |
| I do not feel very knowledgeable about whole grains           | 3 |
| When it comes to whole grains, I really do not know a lot.    | 4 |
| Compared to most other people, I know less about whole grains | 5 |

- Q9. Which of the following best describes what you understand the term "whole grains" to be?
- RANDOMISE ORDER. SINGLE MENTION

|                                                                                                                        |    |
|------------------------------------------------------------------------------------------------------------------------|----|
| Grains which are genetically modified (created or modified through genetic engineering)                                | 1  |
| Grains which are grown organically/ with restricted use of pesticides and fertilizers                                  | 2  |
| Grains which have undergone processing to add certain nutrients                                                        | 3  |
| Grains with all the original, edible parts present in the same proportion, as when the grain was growing in the fields | 4  |
| Any other grains apart from wheat and rice                                                                             | 5  |
| A mixture of multiple grains (Multi-grains)                                                                            | 6  |
| Flour made from intact grains                                                                                          | 7  |
| Ancient grains                                                                                                         | 8  |
| Uncracked kernels                                                                                                      | 9  |
| Other (please specify)                                                                                                 | 10 |
| Don't know/ unsure                                                                                                     | 11 |

- Q10. Which of the items listed below do you understand to be whole grains?
- RANDOMISE ORDER. MULTIPLE MENTION

|                                                |    |
|------------------------------------------------|----|
| Barley                                         | 1  |
| Brown rice                                     | 2  |
| Buckwheat                                      | 3  |
| Chia                                           | 4  |
| Chickpeas                                      | 5  |
| Cous-cous                                      | 6  |
| Flax                                           | 7  |
| Maize                                          | 8  |
| Milletts                                       | 9  |
| Oats                                           | 10 |
| Quinoa                                         | 11 |
| Rye                                            | 12 |
| Sorghum                                        | 13 |
| Soybean                                        | 14 |
| Spelt                                          | 15 |
| Sunflower seed/ pumpkin seeds/ sesame seeds    | 16 |
| Teff                                           | 17 |
| Nuts (Cashew, Peanuts, Pecan, Macadamia, etc.) | 18 |
| Wheat                                          | 19 |
| White rice                                     | 20 |

|                   |    |
|-------------------|----|
| Other (specify)   | 21 |
| None of the above | 22 |

Q11. And which of these products do you believe generally contain whole grains?  
RANDOMISE ORDER. MULTIPLE MENTION.

|                              |    |
|------------------------------|----|
| 2-minute noodles             | 1  |
| Almond milk                  | 2  |
| Breakfast cereals            | 3  |
| Brown bread                  | 4  |
| Brown rice                   | 5  |
| Ciabatta/ French loaf        | 6  |
| Corn flakes                  | 7  |
| Cous-cous                    | 8  |
| Granola bars                 | 9  |
| Low GI bread                 | 10 |
| Mabele/ Maltabella porridges | 11 |
| Maize meal                   | 12 |
| Pasta                        | 13 |
| Popcorn                      | 14 |
| Rolled oats/ oat flakes      | 15 |
| Rye bread                    | 16 |
| Samp                         | 17 |
| Soybean milk                 | 18 |
| Oat porridge                 | 19 |
| Trail mix/ nuts & seeds      | 20 |
| Weetbix                      | 21 |
| White bread                  | 22 |
| White wheat flour            | 23 |
| White rice                   | 24 |
| Whole-wheat bread            | 25 |
| Whole-wheat flour            | 26 |
| Whole-wheat pasta            | 27 |
| Other (Specify)              | 28 |
| None of the above            | 29 |

Q12. Which of the following do you understand to be the benefits of consuming whole grains? Please select up to 5.

RANDOMISE ORDER. MULTIPLE MENTION. MUST SELECT AT LEAST ONE. SELECT UP TO 5 OPTIONS

|                                                 |   |
|-------------------------------------------------|---|
| Better gut/ bowel health                        | 1 |
| Better weight maintenance                       | 2 |
| Healthy skin and bones                          | 3 |
| Helps me lose weight                            | 4 |
| Keeps energy levels up                          | 5 |
| Prevents/ alleviates constipation               | 6 |
| Lower risk of cancer                            | 7 |
| Makes you feel full for a longer period of time | 8 |

|                                                       |    |
|-------------------------------------------------------|----|
| Prevents/ treats numbness/ tingling in hands and feet | 9  |
| Reduced risk of heart disease                         | 10 |
| Reduced risk of stroke                                | 11 |
| Reduced risk of type 2 diabetes                       | 12 |
| Other (please specify)                                | 13 |
| None of the above/ Don't know                         | 14 |

Q13. Which of the following attributes do you associate with whole-grain products? Please select up to 5 that you most associate with whole grains.

RANDOMISE ORDER. MULTIPLE MENTION. MUST SELECT AT LEAST ONE. SELECT UP TO 5 OPTIONS

|                                      |    |
|--------------------------------------|----|
| Affordable                           | 1  |
| Bland                                | 2  |
| Boring                               | 3  |
| Brown                                | 4  |
| Chewy                                | 5  |
| Crunchy                              | 6  |
| Difficult to find where I shop       | 7  |
| Difficult to identify from packaging | 8  |
| Dry                                  | 9  |
| Easy to find where I shop            | 10 |
| Easy to identify from packaging      | 11 |
| Expensive                            | 12 |
| For older people                     | 13 |
| Healthy                              | 14 |
| Heart health                         | 15 |
| Low GI                               | 16 |
| Lowers my cholesterol                | 17 |
| Poor taste                           | 18 |
| Quick and easy to prepare/ cook      | 19 |
| Rough/ dry texture                   | 20 |
| Slimy                                | 21 |
| Tasty                                | 22 |
| Time-consuming to prepare/ cook      | 23 |
| Other (please specify)               | 24 |
| None of the above                    | 25 |

Q14. Medical experts recommend eating whole grains for a balanced diet. Are you aware how much whole grains are recommended for daily consumption?

SINGLE MENTION

|                                                                      |   |
|----------------------------------------------------------------------|---|
| Equivalent to half a bowl of breakfast cereal                        | 1 |
| Equivalent to one bowl of breakfast cereal                           | 2 |
| Equivalent to one bowl of breakfast cereal plus one slice of bread   | 3 |
| Equivalent to one bowl of breakfast cereal plus two slices of bread  | 4 |
| Equivalent to one bowl of breakfast cereal plus four slices of bread | 5 |
| Don't know                                                           | 6 |

Q15. In your opinion, are you consuming sufficient whole-grain foods?

SINGLE MENTION

|                |   |
|----------------|---|
| Far too little | 1 |
| Too little     | 2 |
| Almost enough  | 3 |
| Enough         | 4 |
| Plenty enough  | 5 |

Q16. Which of the following brands do you most associate with the term "whole grains"? Select up to 5 that you most associate with whole grains

RANDOMISE ORDER. MULTIPLE MENTION. RANK TOP 5

Select at least one

|                    |    |
|--------------------|----|
| Bokomo             | 1  |
| Jungle             | 2  |
| Kellogg's          | 3  |
| Otees              | 4  |
| Weetbix            | 5  |
| Pronutro           | 6  |
| Futurelife         | 7  |
| White Star         | 8  |
| Ace                | 9  |
| Nutrific           | 10 |
| Nestle             | 11 |
| Golden Cloud       | 12 |
| Sasko              | 13 |
| Albany             | 14 |
| Nature's choice    | 15 |
| Woolworths         | 16 |
| Snowflake          | 17 |
| Fatti's and Moni's | 18 |
| Koo                | 19 |
| Blue Ribbon        | 20 |
| King Korn          | 21 |
| Monate             | 22 |
| Tastic             | 23 |
| Other (specify)    | 24 |
| None of these      | 25 |

### ATTITUDES TO HEALTH AND WELLNESS

Q17. In general, would you say your health is...?

SINGLE MENTION

|           |   |
|-----------|---|
| Excellent | 5 |
| Very good | 4 |
| Good      | 3 |
| Fair      | 2 |
| Poor      | 1 |
